# Supplementary material for: Immunomodulation and effects on microbiota after in ovo administration of chicken cathelicidin-2
Source: PubMed Central journal article supplement (PMC5988267; doi:10.1371/journal.pone.0198188), 2018-06-05
Supplement: pone.0198188.s008.pdf [file pone.0198188.s008.pdf]

**Table S1 Results of microarray analysis.**

Differentially expressed genes between PBMCs from chickens

treated with D-CATH-2 and control. Data were analyzed by Linear Model for Microarray Analysis (LIMMA) with Benjamini-Hochberg FDR correction.

| <b><i>Gene description</i></b>                                          | <b><i>Fold change<br/>D-CATH-2 vs control</i></b> | <b><i>p-value</i></b> | <b><i>R<sup>2</sup> contamination</i></b> |
|-------------------------------------------------------------------------|---------------------------------------------------|-----------------------|-------------------------------------------|
| COL4A3; type IV collagen alpha 3 chain                                  | 2.48                                              | 0.044                 | 0.178                                     |
| AMACR; alpha-methylacyl-CoA racemase                                    | 2.15                                              | 0.029                 | 0.058                                     |
| ISCA1; iron-sulfur cluster assembly 1 homolog                           | 0.50                                              | 0.037                 | 0.082                                     |
| SRP72 ; signal recognition particle 72 kDa protein                      | 0.48                                              | 0.008                 | 0.356                                     |
| ANKHD1; ankyrin repeat and KH domain-containing protein 1               | 0.37                                              | 0.039                 | 0.001                                     |
| C3ORF55; PQ Loop Repeat containing 2-like                               | 0.35                                              | 0.001                 | 0.292                                     |
| ITGB4; integrin beta-4                                                  | 0.35                                              | 0.001                 | 0.408                                     |
| KCNA1; potassium channel, voltage gated shaker related subfamily A      | 0.30                                              | 0.017                 | 0.001                                     |
| JARID2; jumonji, AT rich interactive domain 2                           | 0.29                                              | 0.021                 | 0.013                                     |
| NUTF; nuclear transport factor 2                                        | 0.29                                              | 0.016                 | 0.002                                     |
| IGSF11; immunoglobulin superfamily, member 11                           | 2.77                                              | 0.043                 | 0.770                                     |
| GRIA4; glutamate receptor, ionotropic, AMPA 4                           | 2.47                                              | 0.020                 | 0.846                                     |
| LRP6; low density lipoprotein receptor-related protein 6                | 2.32                                              | 0.011                 | 0.757                                     |
| VRK2; vaccinia related kinase 2                                         | 2.28                                              | 0.032                 | 0.786                                     |
| MARK3; MAP/microtubule affinity-regulating kinase 3                     | 2.26                                              | 0.011                 | 0.785                                     |
| PTPN13; protein tyrosine phosphatase, non-receptor type 13              | 2.23                                              | 0.004                 | 0.600                                     |
| CRMP1B; collapsin response mediator protein 1                           | 2.16                                              | 0.038                 | 0.584                                     |
| CNNM4; cyclin and CBS domain divalent metal cation transport mediator 4 | 2.06                                              | 0.040                 | 0.702                                     |
| DST; dystonin                                                           | 2.06                                              | 0.039                 | 0.723                                     |
| RAB44; Ras-related protein Rab-3D                                       | 2.05                                              | 0.038                 | 0.716                                     |
| ACOX2; acyl-coenzyme A oxidase                                          | 2.05                                              | 0.041                 | 0.717                                     |
| RILPL1; Rab interacting lysosomal protein-like 1                        | 2.03                                              | 0.049                 | 0.752                                     |
| CPEB2; cytoplasmic polyadenylation element binding protein 2            | 2.02                                              | 0.018                 | 0.728                                     |
| MGLUR5B; metabotropic glutamate receptor 5                              | 2.00                                              | 0.037                 | 0.657                                     |

*Uncharacterized genes (32) are not displayed in this table*
